# Supplementary material for: Hyaluronan Regulates Neuronal and Immune Function in the Rat Small Intestine and Colonic Microbiota after Ischemic/Reperfusion Injury
Source: MDPI journal article supplement (doi:10.3390/cells11213370), 2022-10-25
Supplement: s1 [file s1]

## Supplementary Table S1

**Table S1.** Morphology parameters of the rat small intestine.

| Parameter                                               | non-injured    | non-injured<br>4-MU | Sham          | Sham 4-MU      | injured                         | injured<br>4-MU |
|---------------------------------------------------------|----------------|---------------------|---------------|----------------|---------------------------------|-----------------|
| Mucosa thickness (μm)                                   | 645.90 ± 21.36 | 578.90 ± 16.28      | 665.60 ± 7.94 | 592.4 ± 18.85  | 554.50 ± 15.51** <sup>ooo</sup> | 612.30 ± 9.83   |
| Villi Height (μm)                                       | 381.6 ± 7.086  | 361.9 ± 15.94       | 394.9 ± 9.79  | 351.30 ± 16.84 | 322.10 ± 10.82** <sup>ooo</sup> | 372.30 ± 13.42  |
| Villi width (μm)                                        | 71.67 ± 2.76   | 75.29 ± 3.47        | 74.19 ± 2.18  | 67.14 ± 2.78   | 67.81 ± 2.17                    | 69.96 ± 1.66    |
| Villi density<br>(no of villi/ 0.5 mm<br>linear mucosa) | 2.75 ± 0.11    | 3.42 ± 0.17         | 2.99 ± 0.14   | 3.57 ± 0.28    | 4.00 ± 0.20** <sup>oo</sup>     | 3.32 ± 0.21     |
| Crypt depth (μm)                                        | 264.2 ± 14.87  | 217.8 ± 16.28       | 258.5 ± 3.42  | 241.1 ± 18.85  | 232.4 ± 6.59                    | 240 ± 9.83      |
| Submucosa thickness (μm)                                | 26.44 ± 1.56   | 29.53 ± 3.25        | 30.84 ± 1.34  | 27.29 ± 1.62   | 27.23 ± 0.92                    | 28.36 ± 1.36    |
| Circular muscle thickness (μm)                          | 62.26 ± 1.83   | 63.37 ± 5.03        | 61.36 ± 2.17  | 58.05 ± 1.97   | 66.28 ± 2.34                    | 62.58 ± 4.47    |
| Longitudinal muscle thickness (μm)                      | 31.76 ± 2.04   | 30.19 ± 3.44        | 33.31 ± 1.51  | 32.72 ± 1.89   | 30.48 ± 1.27                    | 31.59 ± 2.33    |
| Paneth cell number                                      | 73.63 ± 9.74   | 44.25 ± 3.11**      | 67.25 ± 6.27  | 42.0 ± 5.07    | 64.63 ± 4.04                    | 47.25 ± 5.76    |
| Goblet cell number                                      | 333.3 ± 47.65  | 368.3 ± 34.51       | 325.8 ± 16.74 | 352.7 ± 33.92  | 379.6 ± 25.81                   | 282.0 ± 15.87   |

Values are presented as the mean ± SEM; N=5 rats/group. \*\* = P<0.01 vs non-injured; <sup>oo</sup> = P<0.01 and P = <0.001 vs Sham by one-way ANOVA with Tukey's test.

## Supplementary Table S2

**Table S2.** Effect of Sparstolonin B on EC<sub>50</sub> values of carbachol concentration–response curves

| Experimental group     | EC <sub>50</sub> (μM) with 95% CI |
|------------------------|-----------------------------------|
| non-injured            | 0.14 (0.08-0.25)                  |
| non-injured SSnB 10 μM | 0.16 (0.11-0.26)                  |
| non-injured SSnB 30 μM | 0.17 (0.09-0.28)                  |
| sham                   | 0.15 (0.11-0.19)                  |
| sham SSnB 10 μM        | 0.25 (0.14-0.49)                  |
| sham SSnB 30 μM        | 0.35 (0.13-1.69)                  |
| injured                | 0.13 (0.06-0.27)                  |
| injured SSnB 10 μM     | 0.29 (0.18-0.48)                  |
| injured SSnB 30 μM     | 0.48 (0.26-0.97)                  |

Values are the mean ± SEM; n = 5 rats/group. No significant differences were observed in EC<sub>50</sub> values among all groups by one-way ANOVA with Tukey's post hoc test. CI: confidence interval.

## Supplementary Figure S1

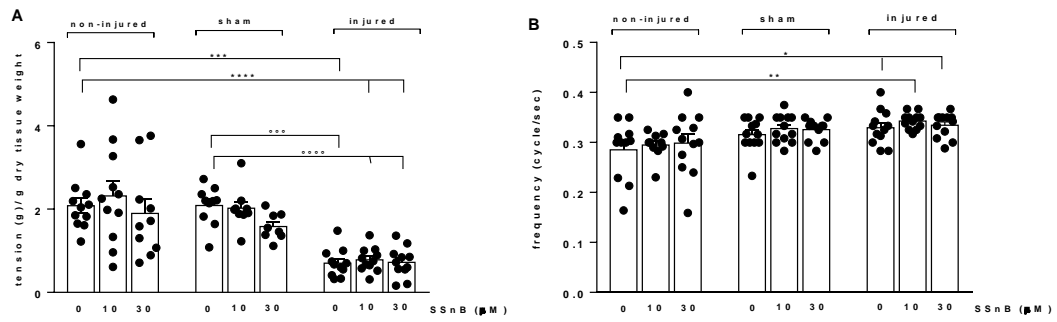

**Supplementary Figure S1.** Frequency and amplitude of the spontaneous contractions in the rat small intestine longitudinal muscle recorded in vitro. **(A)** Amplitude values are expressed as gram of tension. **(B)** Frequency values are expressed as cycle/sec. Values are the mean  $\pm$  SEM. \*\*\*\*,0000 =  $P < 0.0001$ , \*\*\*,000 =  $P < 0.001$  \*\* =  $P < 0.01$  \* =  $P < 0.05$  by one-way ANOVA followed by Tukey's post hoc test. .
